# Supplementary material
Source: PubMed Central journal article supplement (PMC8884473)
Supplement: NIHMS1775998-supplement-supp1-3020958.pdf [file NIHMS1775998-supplement-supp1-3020958.pdf]

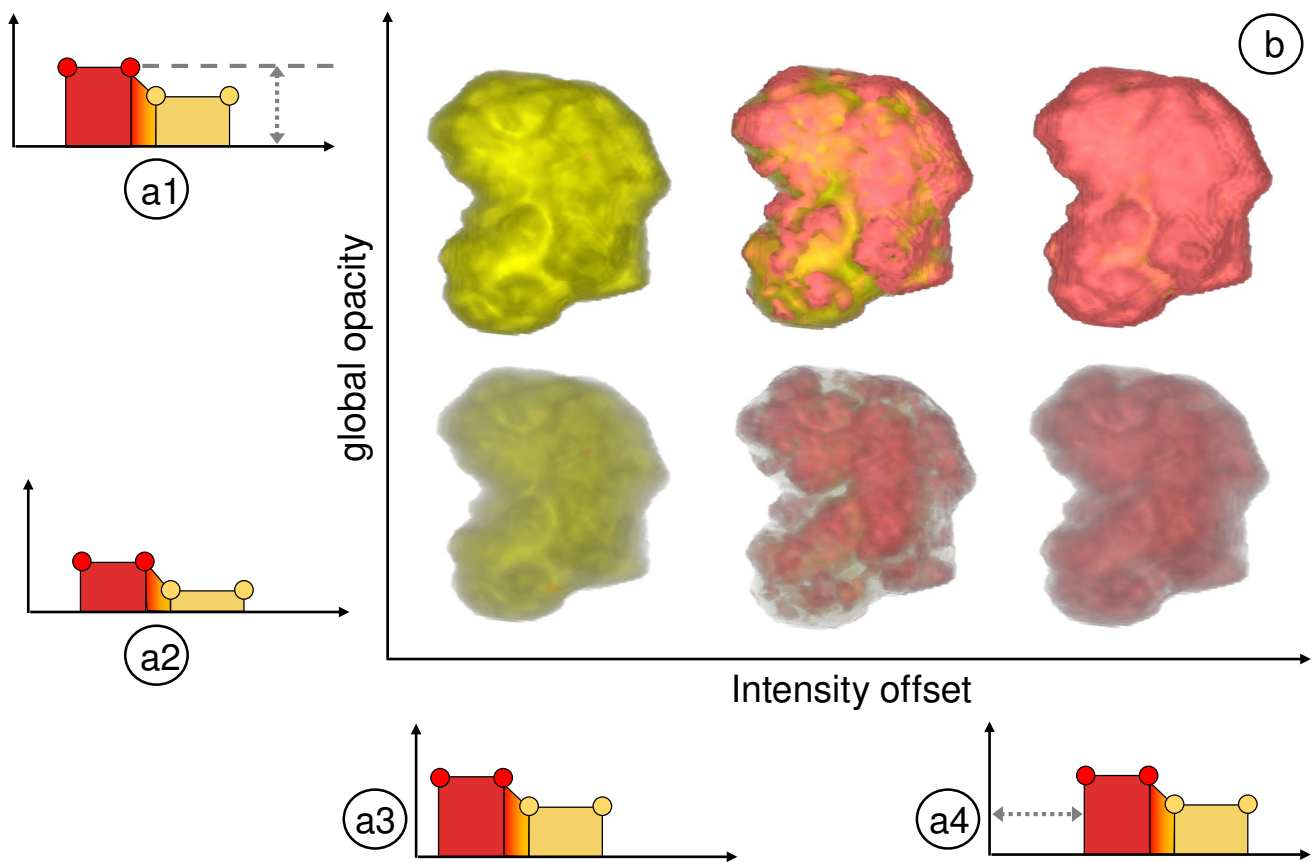

Fig. 16. Illustration of our simplified transfer function editing tool. We provide two sliders that control: global opacity, and intensity offset. The effect of the sliders on a two-color preset transfer function (a1-a4) and the 3D lesion visualization is shown in the illustrative 2D graph (b) above. Global opacity slider shifts the TF in Y-direction (a1, a2). Offset slider shifts the TF in X-direction (a3, a4).
